**Critical Care & Trauma: Monitoring Outcomes**

- A-412** Room G, 10/16/2000 2:00 PM - 4:00 PM (PS)  
**Gastric Intramucosal Acidosis Can Predict the Need for Prolonged Use of Mechanical Ventilation after Cardiac Surgery** Kozaburo Aktyoshi, M.D.; Ken Yamamura, M.D.; Kentaro Tokuda, M.D.; Kazuo Irita, M.D.; Shosuke Takahashi, M.D., Department of Anesthesiology and CCM, Kyushu University, Fukuoka, Japan. pHi and age can be predictors of prolonged mechanical ventilation.
- A-413** Room G, 10/16/2000 2:00 PM - 4:00 PM (PS)  
**Transthoracic Echocardiography in Postoperative Management of Patients Undergoing Heart Surgery** Edith C. Andre, MD; Frederique S. Ryckwaert, MD; Pascal H. Colson, MD, Anesthesia and reanimation B, Saint ELOI, Montpellier, Herault, France. Transthoracic echocardiography can guide postoperative management of patients operated on for heart surgery.
- A-414** Room G, 10/16/2000 2:00 PM - 4:00 PM (PS)  
**A Method to Facilitate the SVC Localization of Catheter during Right Subclavian Catheterization in Children** J.H. Babk, MD; C.W. Chung, MD; Y.J. Lim, MD; H. Ko, MD, Anesthesiology, SNUH, Seoul, Korea. In children, when patients are tilting their heads toward the puncture side during right subclavian catheterization, catheter positions in SVC more frequently than the other positions.
- A-415** Room G, 10/16/2000 2:00 PM - 4:00 PM (PS)  
**Perioperative Cardiac Events and the Use of Cardiac Enzymes and EKG in a Surgical ICU after Non-Cardiac Surgery** Cristina Barboi, MD; William Peruzzi, MD, Anesthesiology, Northwestern University Medical School, Chicago, IL, United States. The utility of postoperative myocardial injury assessment is low when performed without clear reason. Patients should be selectively evaluated.
- A-416** Room G, 10/16/2000 2:00 PM - 4:00 PM (PS)  
**Natriuretic Peptides and Water- and Electrolyte Balance in Critically Ill Patients** Elmar Berendes, MD; Carsten Raufbake, MD; Christoph Schmidt, MD; Hugo Van Aken, MD, FRCA; Michael Walter, MD, Anesthesiology and Intensive Care Medicine, Westfaelische Wilhelms-Universitaet, Muenster, NRW, Germany. ANP but not BNP is involved in the regulation of water and electrolyte balance in the critically ill.
- A-417** Room G, 10/16/2000 2:00 PM - 4:00 PM (PS)  
**Validation of MR In-Vivo Measurement of Oxygen Saturation after Resuscitation with a Hemoglobin-Based Oxygen Carrier in a Rabbit Model** F.P. Chan, M.D., Ph.D.; J.S. Jabr, M.D., Ph.D.; B. Driessen, D.V.M., Ph.D.; D.A. Daunt, D.V.M.; K.C.P. Li, M.D., Anesthesiology/Radiology, UC Davis Med Ctr/Stanford Univ Med Cen, . In a rabbit model, in vivo-MR oximetry after infusion of an HBOC revealed correlation with ex-vivo oximetry.
- A-418** Room G, 10/16/2000 2:00 PM - 4:00 PM (PS)  
**Effects of a Hemoglobin-Based Oxygen Carrier on Conjunctival Microcirculation in Hypovolemic Dogs Studied with Computer-Assisted Intravital Microscopy** A.T.W. Cheung, Ph.D.; J.S. Jabr, M.D.; B. Driessen, D.V.M., Ph.D.; F. Lurie, M.D., Ph.D.; R.A. Gunther, Ph.D., Anesthesiology/Pathology, Univ of Cal Davis, Sacramento, CA. Intravital microscopy shows improved conjunctival microcirculation after HBOC infusion in hypovolemic dogs.
- A-419** Room G, 10/16/2000 2:00 PM - 4:00 PM (PS)  
**New Approach in Non-invasive Measurement of Hb/Hct/SpO<sub>2</sub>** Daniel Geva, MD; Ben-Zion Sklar, MD; Emanuel Menashbkin, MD, Ph.D.; Ilya Fine, Ph.D. Anesthesiology, Kaplan Medical Center, Rehovot, Israel. A new research non-invasive device using NIR spectroscopy and finger systolic occlusion and release of blood flow driven by erythrocyte aggregation/disaggregation has been developed and tested.
- A-420** Room G, 10/16/2000 2:00 PM - 4:00 PM (PS)  
**Influence of Aspirin on the Contribution of Platelets, Hemotocrit and Fibrinogen in Predicting the Thromboelastographic Maximum Amplitude (TEG:MA)** Philip E. Greilich, M.D.; Mangala Kurada, M.D.; Vladislav S. Markin, Ph.D.; Chen Shi, M.D.; Charles W. Whitten, M.D., Anesthesiology, UT Southwestern, Dallas, TX, United States. We showed that correlations between platelets, FIB, HCT and TEG:MA are altered by aspirin.
- A-421** Room G, 10/16/2000 2:00 PM - 4:00 PM (PS)  
**Coagulation Parameters as an Early Prognostic Factor in Major Trauma ?** Matthias Helm, Dr.med.; Markus Brucke, Dr.med.; Jens Hauke, Dr.med.; Lorenz Lampl, PD Dr.med., Dept. of Anaesthesiology and Intensive Care, Federal Armed Forces Medical Center, Ulm, Germany. Complex changes in blood coagulation occur early after trauma. In our study survivors and non-survivors show a significant difference in blood coagulation.
- A-422** Room G, 10/16/2000 2:00 PM - 4:00 PM (PS)  
**Clonidine and Dexmedetomidine Concentration-Dependently Inhibit the Intestinal Peristaltic Reflex In Vitro. Mechanism of Action of Clonidine** Michael K. Herbert, MD; Susanne Roth-Goldbrunner, MD; Peter Holzer, Ph.D.; Norbert Roewer, MD, Dept. of Anesthesiology, University of Wuerzburg, Germany. Clonidine and dexmed inhibit ileal motility through adrenoceptors and opioidergic pathways.
- A-423** Room G, 10/16/2000 2:00 PM - 4:00 PM (PS)  
**Sedation Score (OAA/S) and BIS in Surgical ICU Patients** Jay W. Johansen, MD, Ph.D.; Raj A. Gadbria, BS, Anesthesiology, Emory University School of Medicine, Atlanta, GA, United States. BIS remains correlated with OAA/S in surgical ICU patients, but they respond to voice commands at much lower BIS values than perioperative volunteers.
- A-424** Room G, 10/16/2000 2:00 PM - 4:00 PM (PS)  
**Comparing the Effects of Two Endotracheal Suctioning Methods Using Oxygen Saturation in Trauma Patients with Multi-Organ System Injuries** Calvin Johnson, MD; James Hams, RN; Ferdinand Braimah, MD; Kenneth Lewis, MD; Zobreh Steffens, MD, Nestbesiology, Charles R. Drew U. Med, Martin Luther King Jr. Med, Los Angeles, CA, United States. Hyperoxygenation is not required.
- A-425** Room G, 10/16/2000 2:00 PM - 4:00 PM (PS)  
**Platelet Activation during Hemofiltration** Sibylle A. Kozek, MD; Andrea Michalek, MD; Christian K. Spiss, MD; Burkhard Gustorff, MD; Michael Zimpfer, MD, Anesthesiology and General Intensive Care, University of Vienna, Vienna, Austria. Antiplatelet prostaglandins inhibit early events of platelet activation during hemofiltration.
